# Supplementary material for: Iron–chromium oxide nanoparticles self-assembling into smectic mesophases
Source: Royal Society of Chemistry journal article supplement (doi:10.1039/c3ra47072e), 2013-12-18
Supplement: c3ra47072e.pdf [file c3ra47072e.pdf]

## Supporting Information

for RCS Advances, See DOI: 10.1039/b000000x/

### Iron Chromium Oxide Nanoparticles Self-Assembling into Smectic Mesophases

*M. Iacob, M. Cazacu, C. Racles, M. Ignat, V. Cozan, L. Sacarescu, M. Kajňáková, M. Botko, A. Feher, C. Turta*

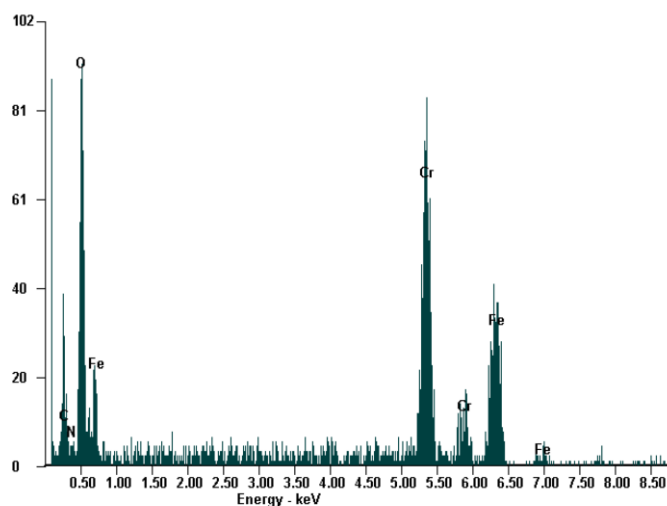

**Figure S1.** EDX spectrum for organic-coated NPs sample.

**Table S1.** The peak assignment (d spacing values) in comparison with literature data

| d value of NPs [ $\text{\AA}$ ] | d value of chromite [ $\text{\AA}$ ] <sup>a)</sup> |
|---------------------------------|----------------------------------------------------|
| 2.93                            | 2.93                                               |
| 2.52                            | 2.53                                               |
| 1.6                             | 1.61                                               |
| 1.48                            | 1.48                                               |

<sup>a)</sup> d value ( $\text{\AA}$ ) from ICDD 34-140 for chromite)

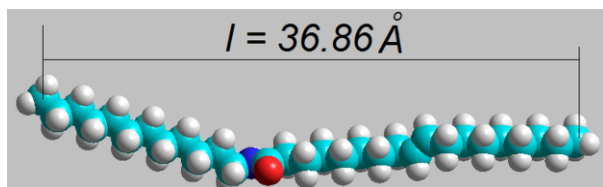

**Figure S2.** Hyperchem simulation of the geometry of an amide chemical model

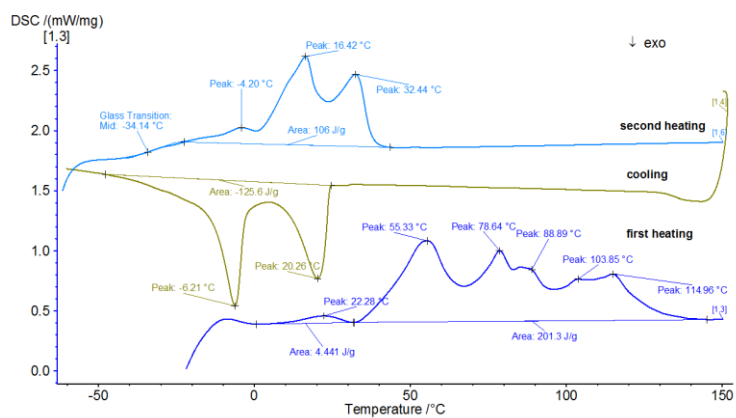

**Figure S3.** DSC thermogram of Sfs at a heating/cooling rate of 10 °C/min under nitrogen.

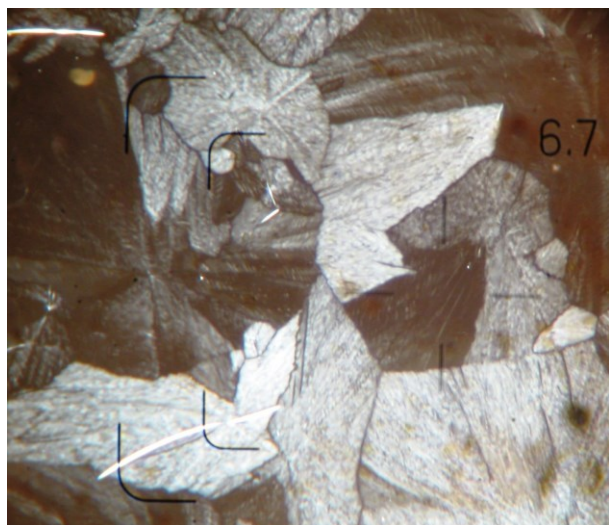

**Figure S4.** Optical polarized light image of Sfs at 50 °C under cooling.

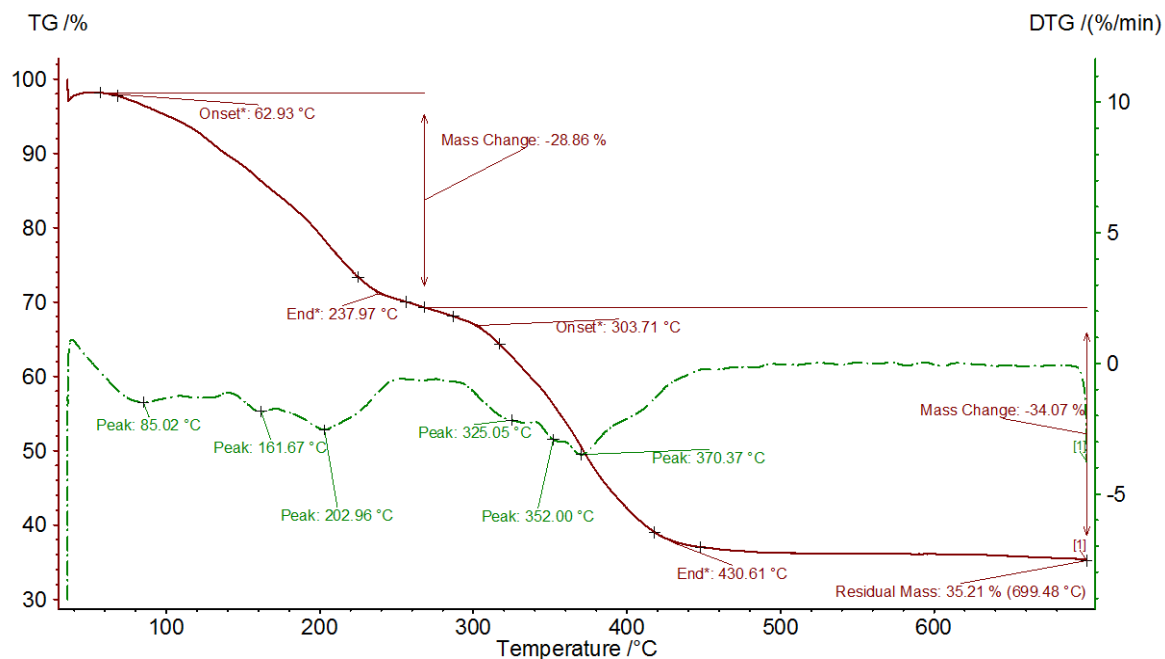

**Figure S5.** TG - DTG curves recorded in nitrogen atmosphere for iron-chromium acetate.

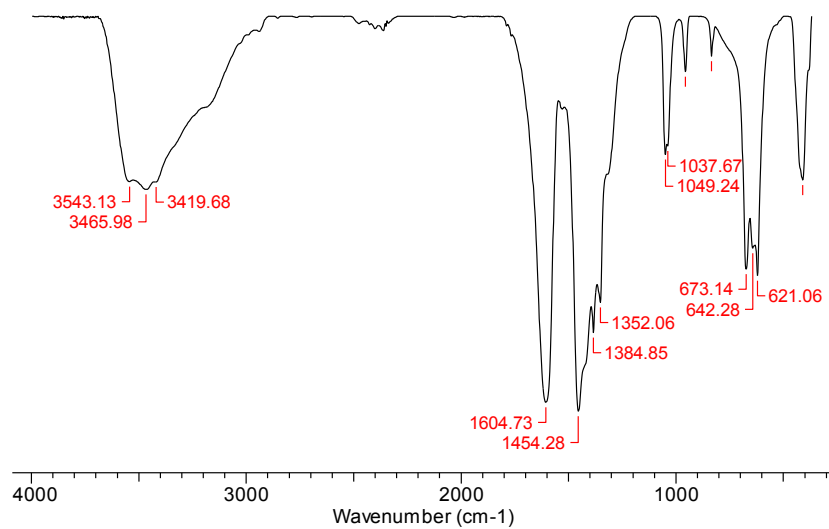

**Figure S6.** FTIR spectrum of  $\mu_3$ -oxo heterotrimeric  $\{\text{FeCr}_2\text{O}\}$  acetate.

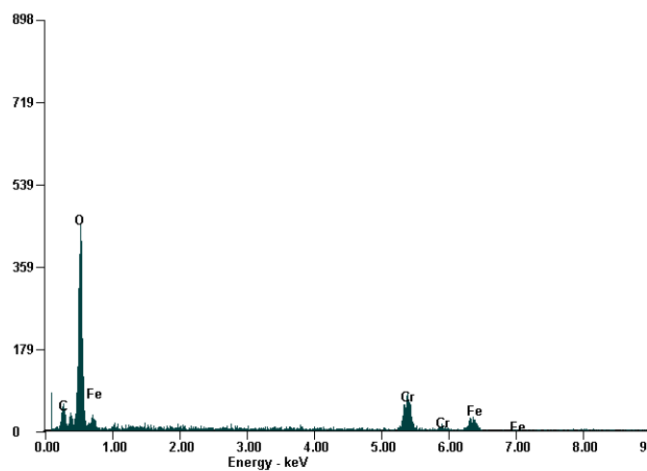

**Figure S7.** EDX spectrum of  $\mu_3$ -oxo heterotrimeric  $\{\text{FeCr}_2\text{O}\}$  acetate.
